# Supplementary material
Source: bioRxiv or medRxiv preprint supplement (https://medrxiv.org/highwire/filestream/72493/field_highwire_adjunct_files/0/2020.02.21.20024737-1.pdf)

# Ethics Committee of Beijing Tsinghua Changgung Hospital

## Ethics Review File

Review SN: 16152-0110

|                                                                                                                                                                                                                                                                                                                                                                                                                                                                                                                                                                                                                                                                                                                                                                                                                                                                                                                                                                                                                                                                                    |                                                                                                                                                         |
|------------------------------------------------------------------------------------------------------------------------------------------------------------------------------------------------------------------------------------------------------------------------------------------------------------------------------------------------------------------------------------------------------------------------------------------------------------------------------------------------------------------------------------------------------------------------------------------------------------------------------------------------------------------------------------------------------------------------------------------------------------------------------------------------------------------------------------------------------------------------------------------------------------------------------------------------------------------------------------------------------------------------------------------------------------------------------------|---------------------------------------------------------------------------------------------------------------------------------------------------------|
| <b>The project name:</b> Clinical Study of Platelet-rich Plasma Promoting Tendon and Bone Healing in Anterior Cruciate Ligament Reconstruction                                                                                                                                                                                                                                                                                                                                                                                                                                                                                                                                                                                                                                                                                                                                                                                                                                                                                                                                     |                                                                                                                                                         |
| <b>The project source:</b> Capital Characteristic Clinical Application Research Fund (CN) 2017                                                                                                                                                                                                                                                                                                                                                                                                                                                                                                                                                                                                                                                                                                                                                                                                                                                                                                                                                                                     |                                                                                                                                                         |
| <b>The project leader:</b>                                                                                                                                                                                                                                                                                                                                                                                                                                                                                                                                                                                                                                                                                                                                                                                                                                                                                                                                                                                                                                                         | Name: <u>Chen Lianxu</u> Department: <u>Orthopaedics</u>                                                                                                |
| <b>The review type:</b>                                                                                                                                                                                                                                                                                                                                                                                                                                                                                                                                                                                                                                                                                                                                                                                                                                                                                                                                                                                                                                                            | <input checked="" type="checkbox"/> Initial review <input type="checkbox"/> Follow-up review: <input type="checkbox"/> Review request<br>Category _____ |
| <b>Review method:</b>                                                                                                                                                                                                                                                                                                                                                                                                                                                                                                                                                                                                                                                                                                                                                                                                                                                                                                                                                                                                                                                              | <input checked="" type="checkbox"/> Real-time review <input type="checkbox"/> Conference review                                                         |
| <b>Review opinions:</b> Application for Capital Characteristic Clinical Application Research Fund (CN) 2017 approved<br>According to <i>The Ethics Review Method for Human-involved Biomedical Extensive Study (2016)</i> of National Health and Family Planning Commission, <i>The Quality Control Standard For Clinical Trials (2003)</i> of The Former State Food and Drug Administration, <i>The Medical Equipment Quality Control Standard for Clinical Trials (2016)</i> of National Agency for Food & Drug Administration and Control and National Health and Family Planning Commission, <i>Helsinki Declaration (2013)</i> of WMA and <i>International Ethical Guidelines for Human Body Biomedical Extensive Investigation</i> of CIOMS ethical principles, approved by the Ethics Committee, the project of “ <b>Clinical Study of Platelet-rich Plasma Promoting Tendon and Bone Healing in Anterior Cruciate Ligament Reconstruction</b> ” conforms to the basic principles of medical ethics and is qualified for the application for government sponsored research. |                                                                                                                                                         |
| <b>Miscellaneous:</b><br>The files shall not be used in any other purposes than the application for Capital Characteristic Clinical Application Research Fund (CN) 2017                                                                                                                                                                                                                                                                                                                                                                                                                                                                                                                                                                                                                                                                                                                                                                                                                                                                                                            |                                                                                                                                                         |
| Ethics Committee of Beijing Tsinghua Changgung Hospital<br>December 13, 2016                                                                                                                                                                                                                                                                                                                                                                                                                                                                                                                                                                                                                                                                                                                                                                                                                                                                                                                                                                                                       |                                                                                                                                                         |
|  <p>The review seal of Ethics<br/>Committee of Beijing Tsinghua<br/>Changgung Hospita<br/>110000015876</p>                                                                                                                                                                                                                                                                                                                                                                                                                                                                                                                                                                                                                                                                                                                                                                                                                                                                                     |                                                                                                                                                         |

I, Sun Qingjuan, certify that I am fluent in English and Chinese languages, and I confirm this is an accurate translation of the original document.

Position: Translator (Qualification: English Translator Level II, Certificate No.: 14002979)

Company: Beijing Tianyi Times Translation Co., Ltd.

Address: Room 0613, Floor 6, Building 1, Yard 2, Second Wuliqiao Street, Chaoyang District, Beijing

Telephone: 010-51652333

Signature: 孙庆娟 Date: September 21, 2019

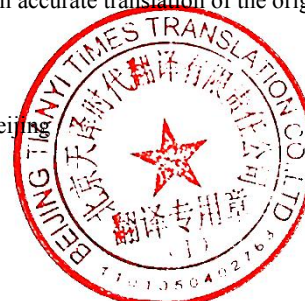

Supplement: Supplementary file [file 2020.02.21.20024737-1.pdf]
